# Eco-evolutionary spatial dynamics of non-linear social dilemmas

Chaitanya S. Gokhale<sup>1,\*</sup> & Hye Jin Park<sup>2</sup>

<sup>1</sup>Research Group for Theoretical Models of Eco-evolutionary Dynamics,  
Department of Evolutionary Theory, Max Planck Institute for Evolutionary Biology,  
August Thienemann Str. 2, 24306, Plön, Germany

<sup>2</sup>Department of Evolutionary Theory, Max Planck Institute for Evolutionary Biology,  
August Thienemann Str. 2, 24306, Plön, Germany

## Abstract

Spatial dynamics can promote the evolution of cooperation. While dispersal processes have been studied in simple evolutionary games, real-world social dilemmas are much more complicated. The public good, in many cases, does not increase linearly as per the investment in it. When the investment is low, for example, every additional unit of the investment may help a lot to increase the public good, but the effect vanishes as the number of investments increase. Such non-linear behaviour is the norm rather than an exception in a variety of social as well as biological systems. We take into account the non-linearity in the payoffs of the public goods game as well as the natural demographic effects of population densities. Population density has also been shown to impact the evolution of cooperation. Coupling these non-linear games and population size effect together with an explicitly defined spatial structure brings us one step closer to the complexity of real eco-evolutionary spatial systems. We show how the non-linearity in payoffs, resulting in synergy or discounting of public goods can alter the effective rate of return on the cooperative investment. Synergy or discounting in public goods accumulation affects the resulting spatial structure, not just quantitatively but in some cases, drastically changing the outcomes. In cases where a linear payoff structure would lead to extinction, synergy can support the coexistence of cooperators and defectors. The combined eco-evolutionary trajectory can thus be qualitatively different in cases on non-linear social dilemmas.

Keywords: non-linear interactions, spatial dynamics, pattern formation, social dilemma, synergy and discounting effect

## 27 1 Introduction

28 The most significant impact of evolutionary game theory has been in the field of social  
29 evolution since a simple two player game [Axelrod, 1984] and its multiplayer version,  
30 the public goods game [Hardin, 1968] can represent the so-called *social dilemma*.  
31 The social dilemma arises when the behaviour (or choice) of an individual result in  
32 the conflict between the benefits of the individual and the group it belongs to. From  
33 decision making to biological behavioural strategies, the prisoner's dilemma and pub-  
34 lic goods games have invited interdisciplinary studies from behavioural economists,  
35 cognitive scientists, psychologists, and biologists providing a fertile field for experi-  
36 mental as well as theoretical developments. While cooperative behaviour raises the  
37 group benefit, cooperators get less benefit than the others who do not cooperate aris-  
38 ing a social dilemma. When interactions take place in a social setting where more  
39 than two individuals are involved, social dilemmas can arise in different categories.  
40 The different possible dilemmas have been categorically defined on a continuum of  
41 the so-called non-linear public goods games [Hauert et al., 2006b] as explored before  
42 by [Eshel and Motro, 1988] in the context of helping behaviour. We call the situation  
43 where the group benefit is linear in the number of cooperators *linear social dilemma*,  
44 and *non-linear social dilemma* is named after their non-linearity. Depending on the  
45 appropriate social context, it is possible that a variation of the social dilemma is more  
46 or less appropriate [Skyrms, 2003]. Archetti and Scheuring [2012] present an excel-  
47 lent review of the use and importance of non-linear public goods game. Interestingly,  
48 situations impossible in two player games can occur in multiplayer games which can  
49 drastically change the evolutionary outcome [Bach et al., 2006, Pacheco et al., 2009,  
50 Souza et al., 2009, Gokhale and Traulsen, 2010, Venkateswaran and Gokhale, 2018].

51 Of the many postulated solutions to the problem of evolution of cooperation, one  
52 of them is spatial structure. Spatial structure can be represented in different forms  
53 such as grouping, explicit space, deme structures and other ways of limiting inter-  
54 actions [Wright, 1930, Ohtsuki et al., 2007, Tarnita et al., 2009, 2011, Hauert and  
55 Imhof, 2012]. Especially in the repeated version of the public goods game, includ-  
56 ing an assortment mechanism promotes cooperation [van Veelen et al., 2010, 2012].  
57 In an explicitly defined space, diffusion dynamics of cooperators and defectors sup-  
58 port the existence of cooperators by forming spatial patterns. Comparable to the  
59 activator-inhibitor systems from the classical studies on morphogenesis by Turing  
60 [Turing, 1952], we can see various patterns with cooperators in the simplified system  
61 taking into account the linear social dilemma and constant diffusion [Wakano et al.,

62 [2009]. Previously we have combined a linear social dilemma with density-dependent  
63 diffusion coefficients [Park and Gokhale, 2019] which comes closer to analysing real  
64 movements seen across species from bacteria to humans [Okubo and Levin, 1980,  
65 Shigesada et al., 1979, Kawasaki et al., 1997, Lou and Martínez, 2009, Loe et al.,  
66 2009, Ohgiwari et al., 1992, Grauwin et al., 2009]. However, as introduced, non-linear  
67 social dilemmas have not been previously discussed in this context. Furthermore,  
68 public goods games are typically analysed in an evolutionary framework but devoid  
69 of the ecological context. Studying social dilemmas have been taken in an ecological  
70 context where along with the evolutionary change, the population dynamics are also  
71 tracked [Hauert et al., 2006a, Gokhale and Hauert, 2016, Park and Gokhale, 2019].  
72 In this study, we aim to take the ecological context into account in non-linear social  
73 dilemmas.

74 In this paper, keeping the diffusion coefficient constant, we study ecological non-  
75 linear public goods games in a spatial dimension. We begin by introducing non-  
76 linearity in the payoff function of the social dilemma, including population dynamics.  
77 Then we include simple diffusion dynamics and analyse the resulting spatial patterns.  
78 For the parameter set comprising of the diffusion coefficients and the multiplication  
79 factor, we can observe the extinction, as well as heterogeneous, or homogenous  
80 patterns. Under certain simplifying assumptions, characterisation of the stability of  
81 the fixed point is possible. We discuss the dynamics of the Hopf bifurcation transi-  
82 tion and the phase boundary between heterogeneous and homogenous patterned  
83 phases. Overall, our results suggest that synergy and discounting affects the relative  
84 size of the extinction and surviving phases. In particular, for synergy, the extinction  
85 region is reduced as the effective benefit increases resulting in an increased possi-  
86 bility of cooperator persistence. For discounting, the extinction region expands. The  
87 development will help contrast the results with the work of [Wakano et al., 2009] and  
88 relates our work to realistic public goods scenarios where the contributions often have  
89 a non-linear impact [Dawes et al., 1986].

## 90 **2 Model & Results**

### 91 **2.1 Non-linear public goods game**

92 Complexity of evolutionary games increases as we move from two-player games to  
93 multiplayer games [Gokhale and Traulsen, 2010]. A similar trend ensues as we move  
94 from linear public goods games to non-linear payoff structures [Archetti and Scheur-

95 [ing, 2012](#)]. A handy method for moving from linear to non-linear multiplayer games is  
 96 given in [Hauert et al. \[2006b\]](#). To introduce this method in our notational form, we will  
 97 first derive the payoffs in a linear setting.

In the classical version of the public goods game (PGG), the cooperators invest  $c$  to the common pool while the defectors contribute nothing. The value of the pool increases by a certain multiplication factor  $r$ ,  $1 < r < N$ , where  $N$  is the group size. The amplified returns are equally distributed to all the  $N$  players in the game. For such a setting the payoffs for cooperators and defectors are given by,

$$\begin{aligned} P_D(m) &= \frac{rcm}{N}, \\ P_C(m) &= \frac{rcm}{N} - c, \end{aligned} \quad (1)$$

where  $m$  is the number of cooperators in the group. As in [Hauert et al. \[2006a\]](#) we are interested in not just the evolutionary dynamics (change in the frequency of cooperators over time) but the ecological dynamics as well (change in the population density over time). This system, analysed by [Hauert et al. \[2006a, 2008\]](#), is briefly re-introduced in our notation for later extension. We characterise the densities of cooperators and defectors in the population as  $u$  and  $v$ . Thus the population density ranges as  $0 \leq u + v \leq 1$  and the vacant space remaining in the niche is  $w = 1 - u - v$ . Low population density means that it is hard to encounter other individuals and accordingly hard to interact with them. Hence the group size  $N$ , the maximum group size in this case, is not always reachable. Instead,  $S$  individuals forming an interacting group. With fixed  $N$  the interacting group size  $S$  is bounded,  $S \leq N$ , and the probability  $p(S; N)$  of interacting with  $S - 1$  individuals is depending on the total population density  $u + v = 1 - w$ . When we consider the focal individual, the probability  $p(S; N)$  of interacting with  $S - 1$  individuals among a maximum group of size  $N - 1$  individuals (excluding the focal individual) is,

$$p(S; N) = \binom{N-1}{S-1} (1-w)^{S-1} w^{N-S}. \quad (2)$$

Then, the average payoffs for defectors and cooperators,  $f_D$  and  $f_C$ , are given as,

$$\begin{aligned} f_D &= \sum_{S=2}^N p(S; N) \overline{P_D}(S), \\ f_C &= \sum_{S=2}^N p(S; N) \overline{P_C}(S), \end{aligned} \quad (3)$$

98 where  $\overline{P}_D(S)$  and  $\overline{P}_C(S)$  are the expected payoffs for defectors and cooperators at a  
 99 given  $S$ . The sum for the group sizes  $S$  starts at two as for a social dilemma there  
 100 need to be at least two interacting individuals.

To derive the expected payoffs, we first need to assess the probability of having a certain number of cooperators  $m$  in a group of size  $S - 1$  which is given by  $p_c(m; S)$ ,

$$p_c(m; S) = \binom{S-1}{m} \left( \frac{u}{1-w} \right)^m \left( \frac{v}{1-w} \right)^{S-1-m}. \quad (4)$$

Thus the payoffs in Eq. (1) are weighted with the probability of having  $m$  cooperators, giving us the expected payoffs,

$$\begin{aligned} \overline{P}_D(S) &= \sum_{m=0}^{S-1} p_c(m; S) P_D(m) = \frac{r}{S} \sum_{m=0}^{S-1} m p_c(m; S), \\ \overline{P}_C(S) &= \sum_{m=0}^{S-1} p_c(m; S) P_C(m+1) \\ &= \frac{r}{S} \sum_{m=0}^{S-1} (m+1) p_c(m; S) - 1, \end{aligned} \quad (5)$$

where the investment cost  $c$  has been set to unity without loss of generality ( $c = 1$ ). The average payoffs  $f_D$  and  $f_C$  are thus given by,

$$\begin{aligned} f_D &= \frac{ru}{1-w} \left[ 1 - \frac{(1-w^N)}{N(1-w)} \right], \\ f_C &= f_D - 1 - (r-1)w^{N-1} + \frac{r}{N} \frac{1-w^N}{1-w}. \end{aligned} \quad (6)$$

As in [Hauert et al. \[2006b\]](#) the parameter  $\Omega$  can introduce the desired non-linearity in the payoffs as,

$$\begin{aligned} P_D(m) &= \frac{rc}{N} (1 + \Omega + \Omega^2 + \dots + \Omega^{m-1}) = \frac{rc}{N} \frac{1 - \Omega^m}{1 - \Omega}, \\ P_C(m) &= P_D(m) - c = \frac{rc}{N} \Omega (1 + \Omega + \dots + \Omega^{m-2}) + \frac{rc}{N} - c. \end{aligned} \quad (7)$$

If  $\Omega > 1$ , every additional cooperator contributes more than the previous, thus providing a synergistic effect. If  $\Omega < 1$ , then every additional cooperator contributes less than the previous, thus saturating the benefits, thus providing a discounting effect. Following the derivation, as earlier [[Gokhale and Hauert, 2016](#)], the average payoffs are given as,

$$\begin{aligned} f_D &= \frac{r}{N} \frac{1}{1-w-u(1-\Omega)} \left[ \frac{(u(\Omega-1)+1)^N - 1}{\Omega-1} - \frac{u(1-w^N)}{1-w} \right], \\ f_C &= f_D - 1 - (r-1)w^{N-1} + \frac{r}{N} \frac{(1-u(1-\Omega))^N - w^N}{1-w-u(1-\Omega)}. \end{aligned} \quad (8)$$

101 The linear version of the PGG can be recovered by setting  $\Omega = 1$ .

## 102 **2.2 Spatial non-linear public goods games**

For tracing the population dynamics, we are interested in the change in the densities of cooperators and defectors over time. Both cooperators and defectors are assumed to have a baseline birth rate of  $b$  and death rate  $d$ . Growth is possible only when the population is not at carrying capacity i.e.  $w > 0$ . We track the densities of cooperators and defectors by an extension of the replicator dynamics [Taylor and Jonker, 1978, Hofbauer and Sigmund, 1998, Hauert et al., 2006a],

$$\begin{aligned}\dot{u} &= u[w(f_C + b) - d], \\ \dot{v} &= v[w(f_D + b) - d].\end{aligned}\tag{9}$$

To include spatial dynamics in the above system we assume that a population of cooperators and defectors resides in a given patch. Game interactions only occur within patches, and the individuals can move adjacent patches. The patches are on a two-dimensional space and are connected in the form of a regular lattice. Taking a continuum limit, we get the differential equations with constant diffusion coefficients for cooperators  $D_c$  and defectors  $D_d$ ,

$$\begin{aligned}\dot{u} &= D_c \nabla^2 u + u[w(f_C + b) - d], \\ \dot{v} &= D_d \nabla^2 v + v[w(f_D + b) - d].\end{aligned}\tag{10}$$

103 At the boundaries, there is no in- and out-flux. As in classical activator-inhibitor sys-  
104 tems, the different ratios of the diffusion coefficient  $D = D_d/D_c$  can generate various  
105 patterns from coexistence, extinction as well as chaos [Wakano et al., 2009].

106 Non-linearity in the PGG is implemented by  $\Omega \neq 1$ . Previous work shows that  
107 the introduction of  $\Omega$  is enriching the dynamics [Hauert et al., 2006b, Gokhale and  
108 Hauert, 2016]. Synergy ( $\Omega > 1$ ) enhances cooperation while discounting ( $\Omega < 1$ )  
109 suppresses it. Accordingly, synergy and discounting change the effective  $r$  values:  
110 With  $\Omega$  larger than unity increasing  $r$ , and vice versa. As shown in Fig. 1, for synergy  
111 effect ( $\Omega = 1.1$ ), we can find a chaotic coexistence of cooperators and defectors. The  
112 same parameter for a linear case ( $\Omega = 1.0$ ) resulted in total extinction of the population  
113 [Wakano et al., 2009]. In the linear case, chaotic patterns were observed for  $r$  values  
114 larger than that of extinction patterns. Thus our observation implies the mechanism  
115 of how synergy works, by effectively increasing  $r$  value.

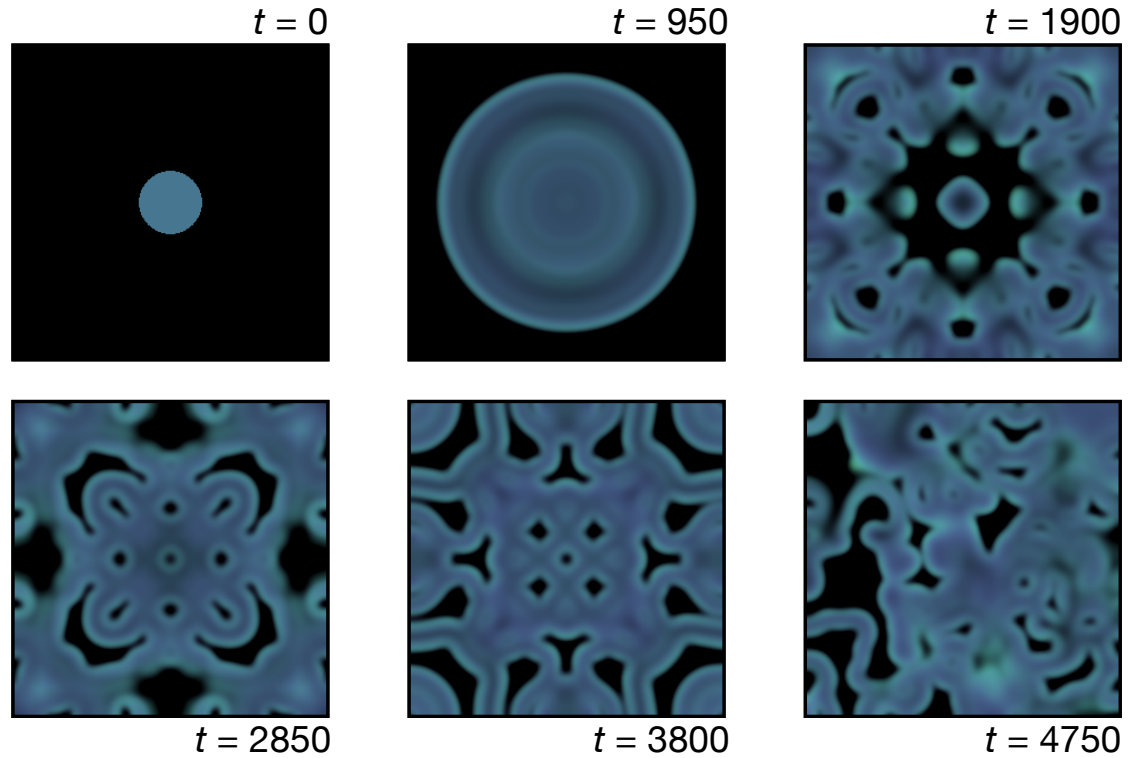

Figure 1: **Pattern formation on the two-dimensional square lattice.** We observe the chaotic pattern for  $\Omega = 1.1$  (synergy effect) where extinction comes out with  $\Omega = 1$  [Wakano et al., 2009]. Mint green and Fuchsia pink colours are used for the cooperators and defectors densities, respectively. For a full explanation of the color scheme we refer to the Appendix A. Black indicates no individual on the site whereas blue appears when the ratio of cooperators and defectors is the same. Initially, a disk with radius  $L/10$  at the centre where  $L$  is the system size is occupied by cooperator and defector densities 0.1, respectively. We use multiplication factor  $r = 2.2$  and diffusion coefficient ratio  $D = 2$ . Throughout the paper, for simulations, we used the system size  $L = 283$ ,  $dt = 0.1$  and  $dx = 1.4$  with the Crank-Nicolson algorithm.

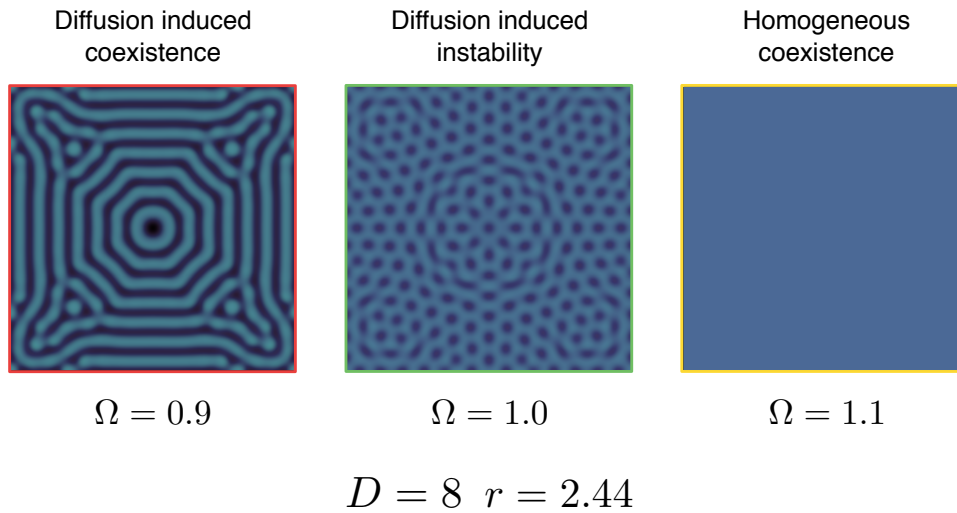

Figure 2: **Synergy and discounting effects on pattern formation.** We get the different patterns under discounting and synergy effects distinct from the linear PGG game at a given the same parameter set. While diffusion induced instability is observed in the linear PGG, the discounting effect makes diffusion induced coexistence pattern implying that the discounting effect makes the Hopf bifurcation point shift to the larger value. Under the synergy effect, on the contrary, we obtain the opposite trend observing the homogenous coexistence pattern. In the linear PGG, the homogenous patterns are observed in higher multiplication factor  $r$  implying the shift of  $r_{hopf}$  to the smaller value under the synergy effect. The frame colors are matched with corresponding phases explained in Fig. 3.



116 The change in the resulting patterns due to synergy or discounting is not limited to  
 117 extinction of chaos but is a general feature of the non-linearity in payoffs. To illustrate  
 118 this change we show how a stable pattern under linear PGG ( $\Omega = 1$ ) can change  
 119 the shape under discounting or synergy in Fig. 2. Such changes in the final structure  
 120 happen all over the parameter space. To confirm this tendency, we examine the  
 121 spatial patterns for various parameters and find five phases, same as in the the linear  
 122 PGG case [Wakano et al., 2009] but now with shifted phase boundaries (see Fig. 3).  
 123 The effective  $r$  increases with an increasing  $\Omega$ , and thus the location of the Hopf  
 124 bifurcation also shifts. As a result of shifting  $r_{hopf}$ , extinction region is reduced in  
 125 the parameter space with synergy effect. We thus focus our attention on the Hopf  
 126 bifurcation point  $r_{hopf}$ .

### 127 2.2.1 Hopf-bifuraction in non-linear PGG

128 We find the Hopf bifurcation point  $r_{hopf}$  for various  $\Omega$  values using Eq. (8). Effective  
 129  $r$  increases as  $\Omega$  increases, and thus  $r_{hopf}$  is monotonically decreasing with  $\Omega$  as in  
 130 Fig 4(a). The tangential line at  $\Omega = 1$  is drawn for comparing the effects of synergy and  
 131 discounting. If we focus on the differences between the tangent and  $r_{hopf}$  line, synergy  
 132 changes  $r_{hopf}$  more dramatically than discounting. Synergy and discounting effects  
 133 originate from  $1 + (1 \pm \Delta\Omega) + (1 \pm \Delta\Omega)^2 + \dots + (1 \pm \Delta\Omega)^{m-1}$  in Eq. (7), where  $\Delta\Omega > 0$   
 134 and plus and minus signs for synergy and discounting, respectively. Straightforwardly,  
 135 the difference between 1 and  $(1 + \Delta\Omega)^k$  is larger than that of  $(1 - \Delta\Omega)^k$  for  $k > 2$ .  
 136 Hence, the non-linear PGG itself gives different  $\Delta r_{hopf}$  for the same  $\Delta\Omega$ .

### 137 2.2.2 Criterion for diffusion induced instability

Since  $\Omega$  changes effective  $r$  value, the phase boundary also moves. By using the lin-  
 ear stability analysis, we find phase boundaries between diffusion induced instability  
 and homogeneous coexistence phases in  $r$ - $D$  space shown in Fig. 4(b). To do that,  
 we introduce new notations, and two reaction-diffusion equations in Eq. (10) can be  
 written as

$$\partial_t \mathbf{u} = \mathbf{D} \nabla^2 \mathbf{u} + \mathbf{R}(\mathbf{u}), \quad (11)$$

138 with density vector  $\mathbf{u} = (u, v)^T$  and matrix  $\mathbf{D} = \begin{pmatrix} D_c & 0 \\ 0 & D_d \end{pmatrix}$ . Elements of the vector

139  $\mathbf{R}(\mathbf{u}) = \begin{pmatrix} g(u, v) \\ h(u, v) \end{pmatrix}$  indicate reaction terms for each density which are the second  
 140 terms in Eq. (10). Without diffusion, the differential equations have homogeneous

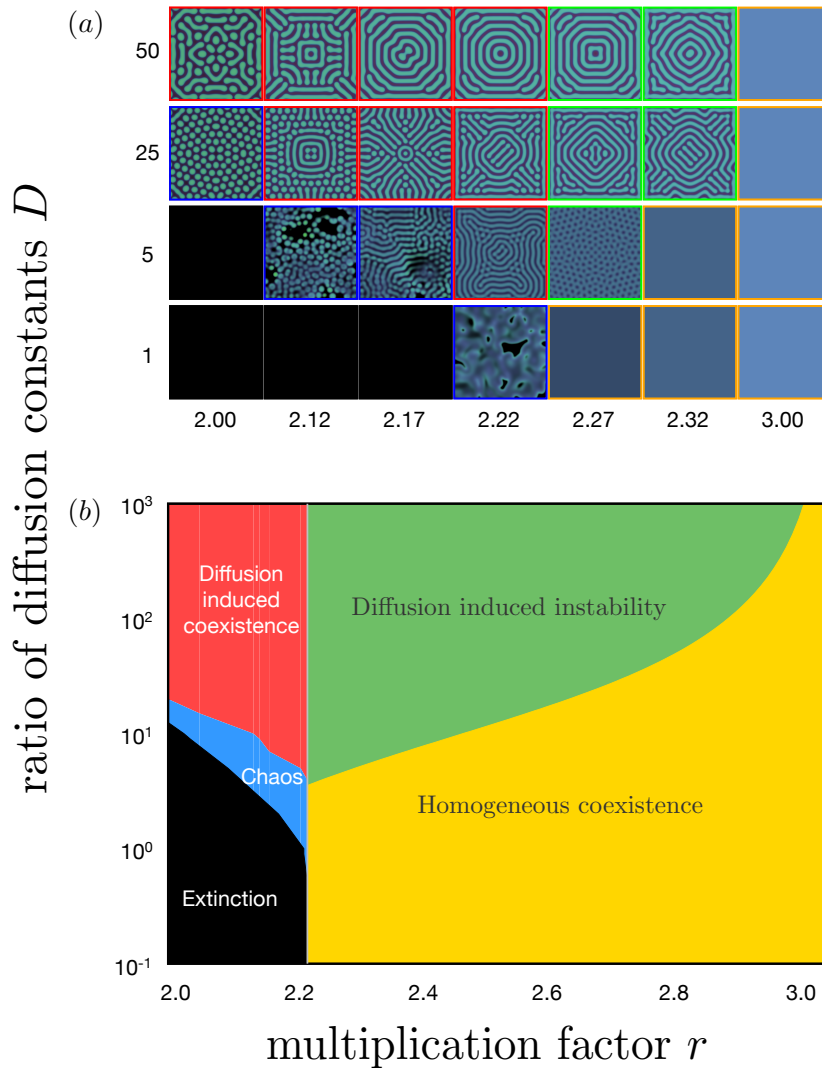

Figure 3: **(a) Spatial patterns and (b) corresponding phase diagram for  $\Omega = 1.1$ .** There are five phases (framed using different colors): extinction (black), chaos (blue), diffusion induced coexistence (red), diffusion induced instability (green), and homogeneous coexistence (orange). The Hopf-bifurcation point  $r_{hopf} \simeq 2.2208$  and the boundary between diffusion induced instability and homogeneous coexistence are analytically calculated, while the other boundaries are from the simulation results. All boundaries and  $r_{hopf}$  shift to the left indicating effective  $r$  increases as compared to a linear public goods game (see Fig. 4).

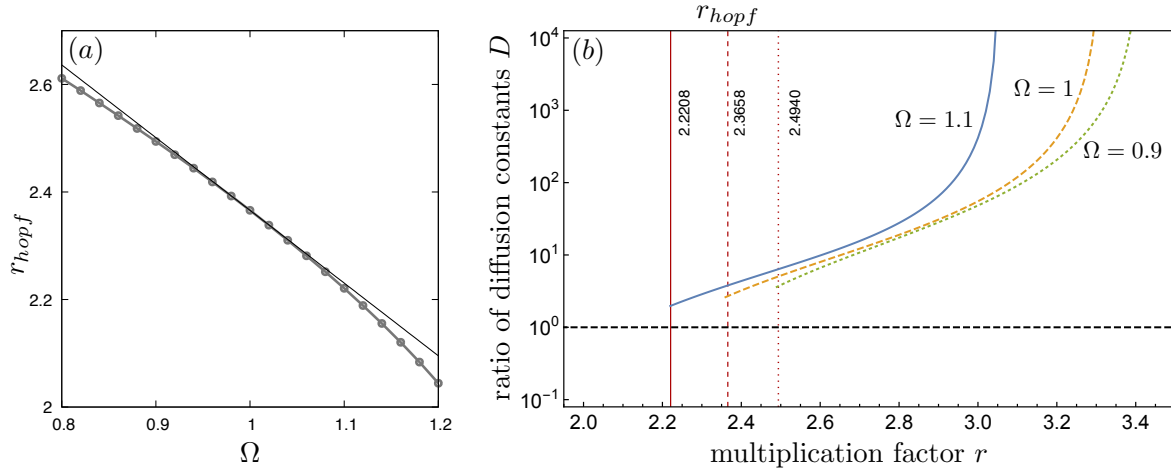

**Figure 4: Hopf bifurcation points in  $\Omega$  and shift of the phase boundary.** (a) The Hopf bifurcation point  $r_{hopf}$  for various  $\Omega$  (solid line with points). Synergy ( $\Omega > 1$ ) decreases  $r_{hopf}$  while discounting ( $\Omega < 1$ ) increases  $r_{hopf}$ . By decreasing  $r_{hopf}$ , the surviving region is extended in the parameter space. The solid line without points is a tangential line at  $\Omega = 1$ . (b) The phase boundaries between diffusion induced instability and homogeneous coexistence phases are also examined for various  $\Omega$ . Since  $r_{hopf}$  increases as decrease with  $\Omega$ , the boundaries also move to the right.

141 solution  $\mathbf{u}_0 = (u_0, v_0)^T$  where  $g(u_0, v_0) = h(u_0, v_0) = 0$ . We assume that the solution is  
 142 a fixed point, and examine its stability under diffusion.

If we consider small perturbation  $\tilde{\mathbf{u}}$  from the homogeneous solution,  $\mathbf{u} \cong \mathbf{u}_0 + \tilde{\mathbf{u}}$ , we get the relation,

$$\partial_t \tilde{\mathbf{u}} = \mathbf{D} \nabla^2 \tilde{\mathbf{u}} + \mathbf{J} \tilde{\mathbf{u}}, \quad (12)$$

143 where  $\mathbf{J} = (\partial \mathbf{R} / \partial \mathbf{u})_{\mathbf{u}_0} \equiv \begin{pmatrix} g_u & g_v \\ h_u & h_v \end{pmatrix} \Big|_{\mathbf{u}_0}$ . Subscripts of the  $g$  and  $h$  mean partial deriva-  
 144 tive of that variable, e.g.,  $g_u$  means  $\partial g / \partial u$ . Decomposing  $\tilde{\mathbf{u}} = \sum_k \mathbf{a}_k e^{ikx}$  based on  
 145 propagation wave number  $k$  gives us relation  $\dot{\mathbf{a}}_k = \mathbf{B} \mathbf{a}_k$  where  $\mathbf{B} \equiv \mathbf{J} - k^2 \mathbf{D}$ . There-  
 146 fore, the stability of the homogeneous solution can be examined by the matrix  $\mathbf{B}$ .  
 147 Note that  $\text{Tr}(\mathbf{B}) < 0$  is guaranteed because  $\text{Tr}(\mathbf{J}) < 0$ . Hence, if the determinant of  $\mathbf{B}$   
 148 is smaller than zero [ $\det(\mathbf{B}) < 0$ ], one of the eigenvalues of the matrix  $\mathbf{B}$  is positive.  
 149 Then, the homogeneous solution becomes unstable and Turing patterns appear.

The condition for  $\det(\mathbf{B}) < 0$  is given by

$$\left( \frac{g_u}{D_u} + \frac{h_v}{D_v} \right)^2 > \frac{4 \det(\mathbf{J})}{D_u D_v}. \quad (13)$$

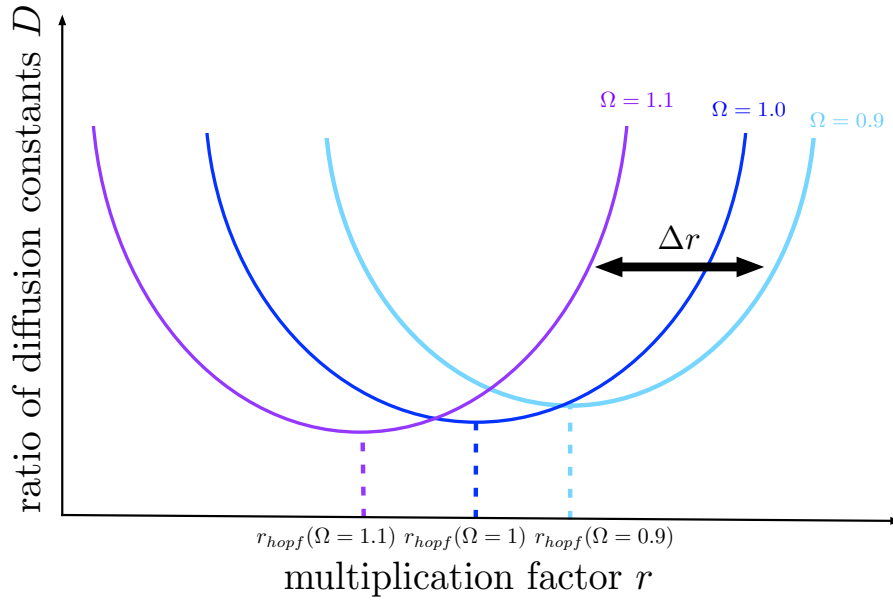

Figure 5: **Schematic figure for expected shift of phase boundaries.** According to the change of  $r_{hopf}$ , over all phase boundaries may shift together at the same direction. As we have seen in Fig. 4(b), the phase boundary with  $r_{hopf}$  move to the right with discounting effect and move to the left with synergy effect, respectively. Accordingly, the surviving region in the parameter space expands with synergy effect while it shrinks with discounting effect.

It can be rewritten as following form

$$\frac{D_v}{D_u} > \frac{g_u h_v - 2g_v h_u + 2\sqrt{-g_v h_u \det(\mathbf{J})}}{g_u^2}. \quad (14)$$

150 If the above criterion is satisfied, the stable fixed point predicted without diffusion  
 151 becomes unstable due to diffusion. From this criterion, we get the analytic phase  
 152 boundary for  $r_{hopf} < r$  as shown in Fig. 4(b).

### 153 3 Discussion

154 Linear public goods game is a useful approximation of the real non-linearities in appli-  
 155 cations of social dilemmas from the micro to the macro scale [Turner and Chao, 1999,  
 156 Gore et al., 2009, Packer and Ruttan, 1988] with application such as in cancer [Aktipis,  
 157 2016] as well as antibiotic resistance [Lee et al., 2010]. However, when non-linearities  
 158 are taken into account, the resulting outcomes might often be different from what is  
 159 naively expected [Gokhale and Hauert, 2016]. In this manuscript, we have extended

160 the analysis of spatial public goods games beyond the traditional linear public goods  
161 games. The benefits in our case are accrued in a non-linear fashion in the number  
162 of cooperators in the group. Each cooperator can provide more benefit than the last  
163 one as the number of cooperators increases (resulting in synergy) or each cooperator  
164 provides a smaller benefit than the previous one (thus leading to discounting) [Hauert  
165 et al., 2006b]. Such an extension to public goods games was proposed very early on  
166 by Eshel and Motro [1988]. Termed as superadditivity in benefits, extending from the  
167 paper one can visualise non-linearities cropping up in the costs as well, a concept not  
168 yet dealt with.

169 Again, such economies of scale [Dawes et al., 1986] can be justified in both bac-  
170 terial as well as human interaction as proxies for quorum quenching or accruing of  
171 wealth (or austerity) [Archetti, 2009, Archetti and Scheuring, 2010, Peña et al., 2015].  
172 Non-linearities in interactions have a profound effect when it comes to fecundity and  
173 avoiding predation by being in a group [Zöttl et al., 2013, Wrona and Jamieson Dixon,  
174 1991]. We show that including such non-linearities in the benefit function affects the  
175 effective rate of return from the public goods game, irrespective of the types of dif-  
176 fusion dynamics. Just as in a non-spatial case, synergy can improve the level of  
177 cooperation in a population, in the spatial case, synergy increases the effective rate  
178 of return on the investment and expands the surviving region in the parameter space.  
179 This itself may make cooperation a favourable strategy. It would be interesting to  
180 see if the stability of the patterns is maintained as  $\Omega$  switches between synergy and  
181 discounting over time [Gokhale and Hauert, 2016]. Such seasonal variations in the  
182 rate of return fundamentally change the selection pressures on cooperation and de-  
183 fection and can lead to not just richer evolutionary dynamics [McNamara, 2013] but  
184 eco-evolutionary spatial dynamics.

185 **Acknowledgements.** We thank Christoph Hauert for comments and suggestions  
186 on a previous version of the study. Both authors acknowledge generous support from  
187 the Max Planck Society.

## 188 References

- 189 Athena Aktipis. Principles of cooperation across systems: from human sharing to  
190 multicellularity and cancer. *Evolutionary Applications*, 9(1):17–36, 2016.
- 191 M. Archetti. Cooperation as a volunteer’s dilemma and the strategy of conflict in public  
192 goods games. *Journal of Evolutionary Biology*, 11:2192–2200, 2009.

- 193 M Archetti and I Scheuring. Co-existence of cooperation and defection in public goods  
194 games. *Evolution*, 65(4):1140–1148, 2010.
- 195 M Archetti and I Scheuring. Review: Game theory of public goods in one-shot social  
196 dilemmas without assortment. *Journal of Theoretical Biology*, 299(0):9–20, 2012.
- 197 R. Axelrod. *The evolution of cooperation*. Basic Books, New York, NY, 1984.
- 198 L A Bach, T Helvik, and Freddy Bugge Christiansen. The evolution of  $n$ -player co-  
199 operation - threshold games and ESS bifurcations. *Journal of Theoretical Biology*,  
200 238:426–434, Jul 2006.
- 201 Robyn M. Dawes, John M. Orbell, Randy T. Simmons, and Alphons J. C. Van  
202 De Kragt. Organizing groups for collective action. *The American Political Science*  
203 *Review*, 80(4):1171–1185, 1986. ISSN 00030554, 15375943.
- 204 Ilan Eshel and Uzi Motro. The Three Brothers' Problem: Kin Selection with More than  
205 One Potential Helper. 1. The Case of Immediate Help. *The American Naturalist*,  
206 132(4):550–566, 1988.
- 207 C. S. Gokhale and A. Traulsen. Evolutionary games in the multiverse. *Proceedings*  
208 *of the National Academy of Sciences USA*, 107:5500–5504, 2010.
- 209 Chaitanya S Gokhale and Christoph Hauert. Eco-evolutionary dynamics of social  
210 dilemmas. *Theoretical Population Biology*, 111:28–42, 2016.
- 211 J. Gore, H. Youk, and A. van Oudenaarden. Snowdrift game dynamics and facultative  
212 cheating in yeast. *Nature*, 459:253–256, 2009.
- 213 Sébastien Grauwin, Eric Bertin, Rémi Lemoy, and Pablo Jensen. Competition be-  
214 tween collective and individual dynamics. *Proceedings of the National Academy of*  
215 *Sciences of the United States of America*, 106(49):20622–20626, 2009.
- 216 G. Hardin. The tragedy of the commons. *Science*, 162:1243–1248, 1968.
- 217 C. Hauert and L. Imhof. Evolutionary games in deme structured, finite populations.  
218 *Journal of Theoretical Biology*, 299:106–112, 2012.
- 219 C. Hauert, M. Holmes, and M. Doebeli. Evolutionary games and population dynam-  
220 ics: maintenance of cooperation in public goods games. *Proceedings of the Royal*  
221 *Society B*, 273:2565–2570, 2006a.

- 222 C. Hauert, F. Michor, M. A. Nowak, and M. Doebeli. Synergy and discounting of co-  
223 operation in social dilemmas. *Journal of Theoretical Biology*, 239:195–202, 2006b.
- 224 C. Hauert, J. Yuichiro Wakano, and M. Doebeli. Ecological public goods games:  
225 cooperation and bifurcation. *Theoretical Population Biology*, 73:257–263, 2008.
- 226 J. Hofbauer and K. Sigmund. *Evolutionary Games and Population Dynamics*. Cam-  
227 bridge University Press, Cambridge, UK, 1998.
- 228 K. Kawasaki, A. Mochizuki, M. Matsushita, T. Umeda, and N. Shigesada. Model-  
229 ing spatio-temporal patterns generated by bacillus subtilis. *Journal of Theoretical*  
230 *Biology*, 188:177–185, 1997.
- 231 Henry H Lee, Michael N Molla, Charles R Cantor, and James J Collins. Bacterial  
232 charity work leads to population-wide resistance. *Nature*, 467(7311):82–85, 2010.
- 233 Leif Egil Loe, Atle Mysterud, Vebjørn Veiberg, and Rolf Langvatn. Negative density-  
234 dependent emigration of males in an increasing red deer population. *Proc. R. Soc.*  
235 *B*, 276:2581–2587, 2009.
- 236 Yuan Lou and Salome Martínez. Evolution of cross-diffusion and self-diffusion. *Jour-*  
237 *nal of Biological Dynamics*, 3(4):410–429, 2009.
- 238 J. M. McNamara. Towards a richer evolutionary game theory. *Journal of The Royal*  
239 *Society Interface*, 10:20130544, 2013.
- 240 M. Ohgiwari, M. Matsushita, and T. Matsuyama. Morphological changes in growth  
241 phenomena of bacterial colony patterns. *J. Phys. Soc. Jap.*, 61:816–822, 1992.
- 242 H. Ohtsuki, J.M. Pacheco, and M. A. Nowak. Evolutionary graph theory: Breaking the  
243 symmetry between interaction and replacement. *Journal of Theoretical Biology*,  
244 246:681–694, 2007.
- 245 Akira Okubo and Smon A. Levin. *Diffusion and Ecological Problems: Mathematical*  
246 *Models*. Springer-Verlag, 1980.
- 247 J. M. Pacheco, F. C. Santos, M. O. Souza, and B. Skyrms. Evolutionary dynamics of  
248 collective action in n-person stag hunt dilemmas. *Proceedings of the Royal Society*  
249 *B*, 276:315–321, 2009.
- 250 C. Packer and L. Ruttan. The evolution of cooperative hunting. *The American Natu-*  
251 *ralist*, 132:159–198, 1988.

- 252 Hye Jin Park and Chaitanya S Gokhale. Ecological feedback on diffusion dynamics.  
253 *Journal of the Royal Society Open Science*, 6:181273, 2019.
- 254 Jorge Peña, Georg Nöldeke, and Laurent Lehmann. Evolutionary dynamics of collec-  
255 tive action in spatially structured populations. *Journal of Theoretical Biology*, 382:  
256 122–136, 2015.
- 257 Nanako Shigesada, Kohkichi Kawasaki, and Ei Teramoto. Spatial segregation of in-  
258 teracting species. *Journal of Theoretical Biology*, 79(1):83–99, 1979.
- 259 B. Skyrms. *The Stag-Hunt Game and the Evolution of Social Structure*. Cambridge  
260 University Press, Cambridge, 2003.
- 261 M. O. Souza, J. M. Pacheco, and F. C. Santos. Evolution of cooperation under n-  
262 person snowdrift games. *Journal of Theoretical Biology*, 260:581–588, 2009.
- 263 C. E. Tarnita, T. Antal, H. Ohtsuki, and M. A. Nowak. Evolutionary dynamics in set  
264 structured populations. *Proceedings of the National Academy of Sciences USA*,  
265 106:8601–8604, 2009.
- 266 C. E. Tarnita, N. Wage, and M. A. Nowak. Multiple strategies in structured populations.  
267 *Proceedings of the National Academy of Sciences USA*, 108:2334–2337, 2011.
- 268 P. D. Taylor and L. B. Jonker. Evolutionarily stable strategies and game dynamics.  
269 *Mathematical Biosciences*, 40:145–156, 1978.
- 270 A. M. Turing. The chemical basis of morphogenesis. *Philosophical Transactions of*  
271 *the Royal Society B*, 237(641):37–72, 1952.
- 272 P. E. Turner and L. Chao. Prisoner’s Dilemma in an RNA virus. *Nature*, 398:441–443,  
273 1999.
- 274 M. van Veelen, J. Garcia, and L. Avilés. It takes grouping and cooperation to get  
275 sociality. *Journal of Theoretical Biology*, 264(4):1240–1253, 2010.
- 276 M. van Veelen, J. García, D. G. Rand, and M. A. Nowak. Direct reciprocity in struc-  
277 tured populations. *Proceedings of the National Academy of Sciences USA*, 109:  
278 9929–9934, 2012.
- 279 Vandana Revathi Venkateswaran and Chaitanya S Gokhale. Evolutionary dynamics  
280 of multiple games. *bioRxiv*, 2018. doi: 10.1101/302265.



281 J. Y. Wakano, M. A. Nowak, and C. Hauert. Spatial dynamics of ecological public  
282 goods. *Proceedings of the National Academy of Sciences USA*, 106:7910–7914,  
283 2009.

284 Sewall Wright. The genetical theory of natural selection. *Journal of Heredity*, 21:  
285 349–356, 1930.

286 F J Wrona and R W Jamieson Dixon. Group Size and Predation Risk: A Field Analysis  
287 of Encounter and Dilution Effects. *The American Naturalist*, 137(2):186–201, 1991.

288 M Zöttl, J G Frommen, and M Taborsky. Group size adjustment to ecological demand  
289 in a cooperative breeder. *Proceedings of the Royal Society B: Biological Sciences*,  
290 280(1756):20122772, 2013.

## 291 **A Colour coding**

Similar to the colour coding used in [Park and Gokhale \[2019\]](#) we use mint green (color code: #A7FF70) and Fuchsia pink (color code: #FF8AF3) colors for denoting the cooperator and defector densities respectively for each type. The colour spectrum and saturation is determined by the ratio of cooperators to defectors which results in the Maya blue color for equal densities of cooperators and defectors. For convenience, we use HSB color space which is a cylindrical coordinate system  $(r, \theta, h) =$  (saturation, hue, brightness). The radius of circle  $r$  indicates saturation or the color whereas  $\theta$  helps us transform the RGB space to HSB. The total density of the population  $\rho = u + v$  is represented by the brightness  $h$  of the color. For better visualization, we formulate the brightness  $h$  as

$$\frac{\log a\rho + 1}{\log a + 1}, \quad (\text{A.1})$$

292 where a control parameter  $a$  ( $> -1$  and  $\neq 0$ ) (see Fig [A.1](#)). The complete color  
293 scheme so developed passes the standard tests for colourblindness.

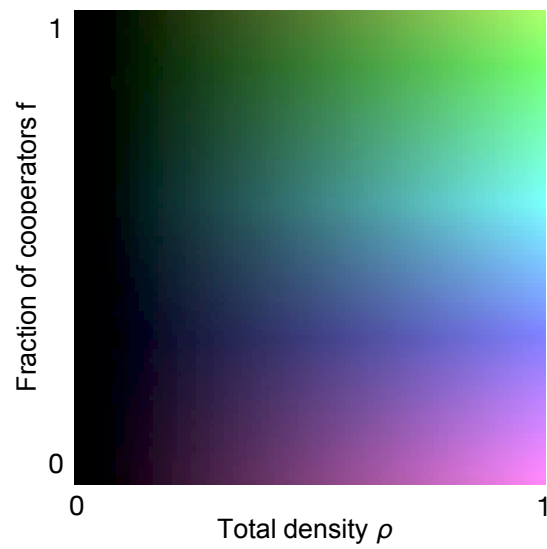

Figure A.1: The exact color scheme developed for coloring the patterns. Each patch in a pattern is colored using this palette by choosing the corresponding  $f$  and  $\rho$  values. For brightness we used Eq. (A.1) with  $a = 15$ .
